# Supplementary material for: Enhancing high-performance supercapattery electrodes: harnessing structural and compositional synergies via phosphorus doping on bimetallic boride for rapid charging
Source: Royal Society of Chemistry journal article supplement (doi:10.1039/d3ta04124g), 2023-01-01
Supplement: d3ta04124g1.pdf [file d3ta04124g1.pdf]

1 **Supporting Information**

2 **Enhancing High-Performance Supercapattery Electrodes: Harnessing**  
3 **Structural and Compositional Synergies via Phosphorus Doping on Bimetallic**  
4 **Boride for Rapid Charging**

5 *Amarnath T. Sivagurunathan<sup>a</sup>, T. Kavinkumar<sup>a</sup>, Selvaraj Seenivasan<sup>a</sup>, Yongchai Kwon<sup>b,\*</sup>, and Do-*  
6 *Heyoung Kim<sup>a,\*</sup>*

7 <sup>a</sup> School of Chemical Engineering, Chonnam National University, 77 Yongbong-ro, Gwangju  
8 61186, Republic of Korea.

9 <sup>b</sup> Department of Chemical and Biomolecular Engineering, Seoul National University of Science  
10 and Technology, 232 Gongneung-ro, Nowon-gu, Seoul 01811, Republic of Korea.

11

12 \*Corresponding author's email: [kdhh@chonnam.ac.kr](mailto:kdhh@chonnam.ac.kr) (D.-H. Kim), [kwony@seoultech.ac.kr](mailto:kwony@seoultech.ac.kr) (Y.  
13 Kwon)

14 Tel. (office): +82-62-530-1894 (D.-H. Kim), +82-2-970-6805 (Y. Kwon)

15

16

17

18

19

20

21

## 22 **Characterizations**

23 X-ray diffraction (XRD) analysis was conducted using a Rigaku X-ray diffractometer with  $\text{CuK}\alpha$   
24 radiation. The morphology and microstructure of the samples were examined using high-resolution  
25 scanning electron microscopy (HR-SEM; JEOL JSM-7500F) and transmission electron  
26 microscopy (TEM; TECNAI G2 F20 TEM system). X-ray photoelectron spectroscopy (XPS) was  
27 employed using an ESCALAB-MKII system (VG Scientific Co.). XPS had an Al K alpha source,  
28 and the results had been characterized by the Fityk software. Gaussian as a fitting function was  
29 used to characterize the XPS results. Brunauer-Emmett-Teller (BET, ASAP2010, Micromeritics)  
30 analysis was used to determine the surface area of the prepared samples.

## 31 **Supercapattery measurements**

32 The electrochemical capacitive properties of the as-synthesized nanostructure electrodes were  
33 investigated in an aqueous 2 M KOH solution using a three-electrode cell. The as-fabricated  
34 materials on Ni foam, platinum (Pt) foil and standard calomel electrode (SCE) were employed as  
35 the working, counter, and reference electrodes, respectively. The mass loadings of P-NCB and R-  
36 GO were calculated to be  $3.5 \text{ mg cm}^{-2}$  and  $2 \text{ mg cm}^{-2}$  respectively. In the supercapattery cell, the  
37 P-NCB electrode was used as the positrode and R-GO as the negatrode with 2M KOH/PVA gel  
38 employed as the electrolyte.

39 The specific capacitance ( $C_s$ ,  $\text{F g}^{-1}$ ) and specific capacity ( $C_m$ ,  $\text{C g}^{-1}$ ) were calculated from  
40 galvanostatic charge/discharge (GCD) testing using the Eq. (1) and (2), respectively<sup>1</sup>:

$$41 \quad C_s = \frac{2i/V dt}{m (V_f - V_i)^2} \quad (1)$$

42 
$$C_m = C_s \times \Delta V \quad (2)$$

43

44 where,  $m$  (g),  $i$  (A),  $(V_f - V_i)$ , and  $\int V dt$  are the mass of the active materials coated on the Ni foam,  
45 the applied current, the functional potential frame, and the integral area of the discharge curve,  
46 respectively.

47 The energy density ( $E$ ) and power density ( $P$ ) of the supercapattery were calculated according to  
48 Eq. (3) and (4), respectively:

49 
$$E = \frac{I \int V dt}{3.6} \quad (3)$$

50 
$$P = \frac{3600 \times E}{t} \quad (4)$$

51 where  $I$  ( $A g^{-1}$ ) and  $t$  (s) are the current density, and discharge time of the supercapattery cell,  
52 respectively.

### 53 **Supercapattery device fabrication**

54 The solid-state supercapattery device was assembled by using optimized P-NCB as the positrode  
55 and R-GO as the negatrode with cellulose paper as a separator, respectively. A PVA–KOH gel  
56 electrolyte was used as the conducting medium in the assembled two-electrode device system. The  
57 gel electrolyte was prepared by taking about 10 gm PVA in 80 mL deionized water and kept at  
58 160 °C for about 4 h for complete dissolution. Separately, 2M KOH solution was prepared in 20  
59 mL deionized water and added to the above solution to form a PVA–KOH gel electrolyte with  
60 required consistency. Both the negatrode and positrodes were soaked in the electrolyte along with  
61 the cellulose paper for about 5 min. After proper soaking, the device was assembled and allowed

62 to dry under the air atmosphere for about 24 h to obtain a completely solidified device. The dried  
63 solid-state supercapattery device was subjected to cyclic voltammetry and galvanostatic charge–  
64 discharge analysis. The cyclic stability of the fabricated asymmetric supercapacitor device has  
65 been recorded using an automatic battery cycler (WBCS3000)<sup>2</sup>.

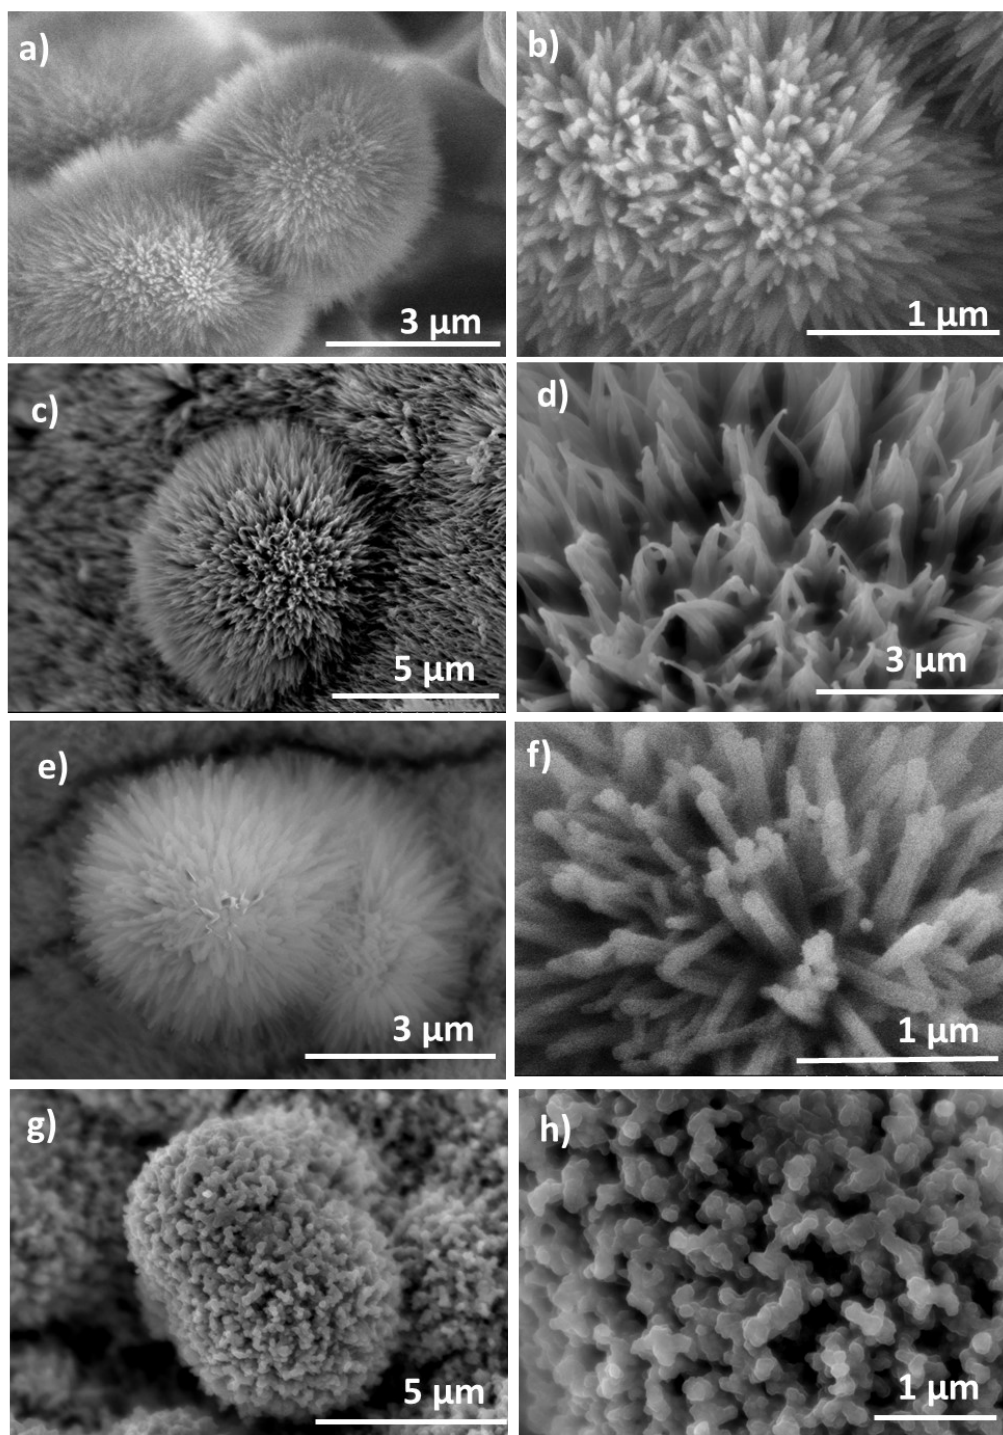

66

67 **Fig. S1.** SEM images of the nanostructure of the (a, b) NC, (c, d) NCB, (e, f) P-NC and (g, h) P-  
68 NCB samples.

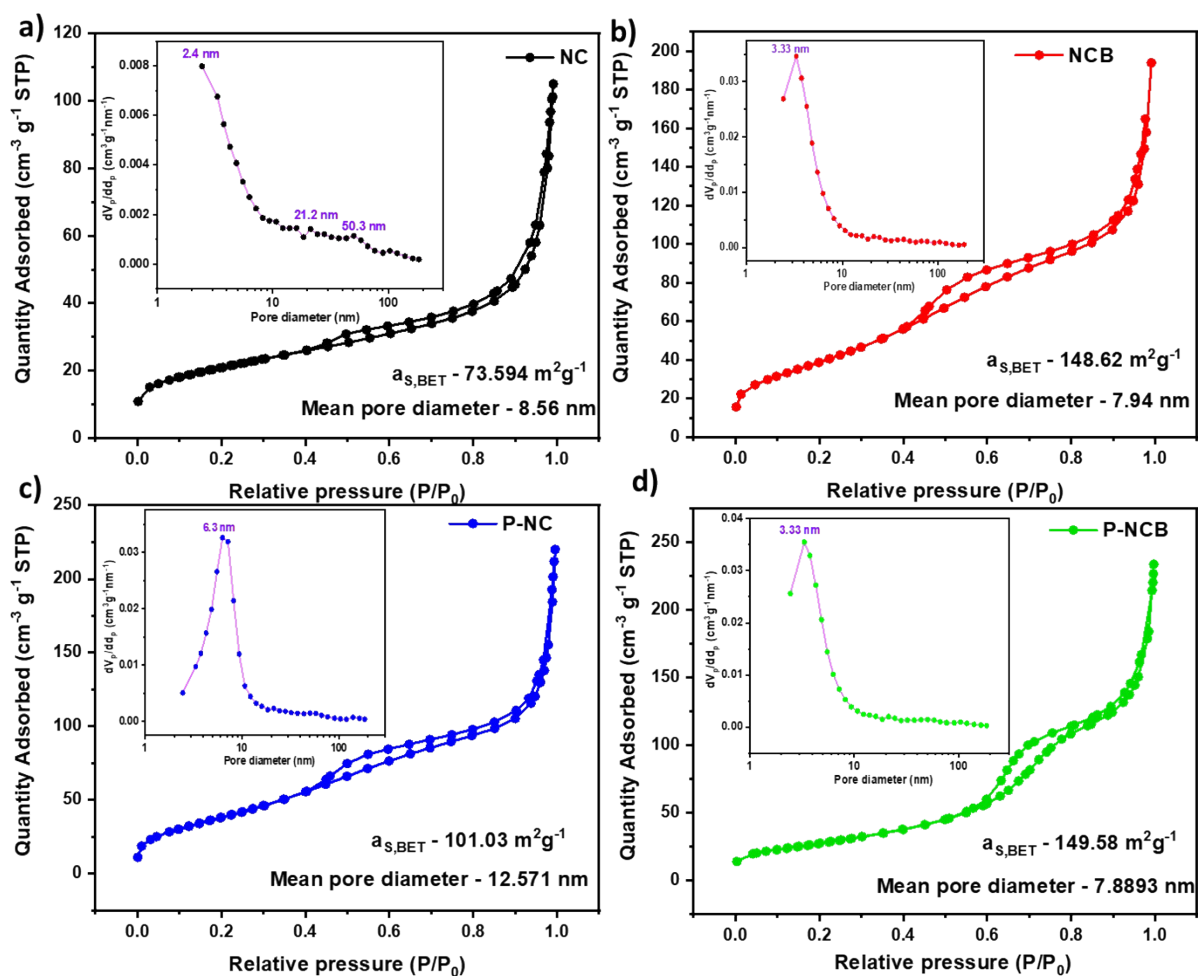

69

70 **Fig. S2.**  $N_2$  adsorption-desorption isotherms for (a) NC, (b) NCB, (c) P-NC and (d) P-NCB  
 71 samples. The inset shows the corresponding pore size distribution profiles.

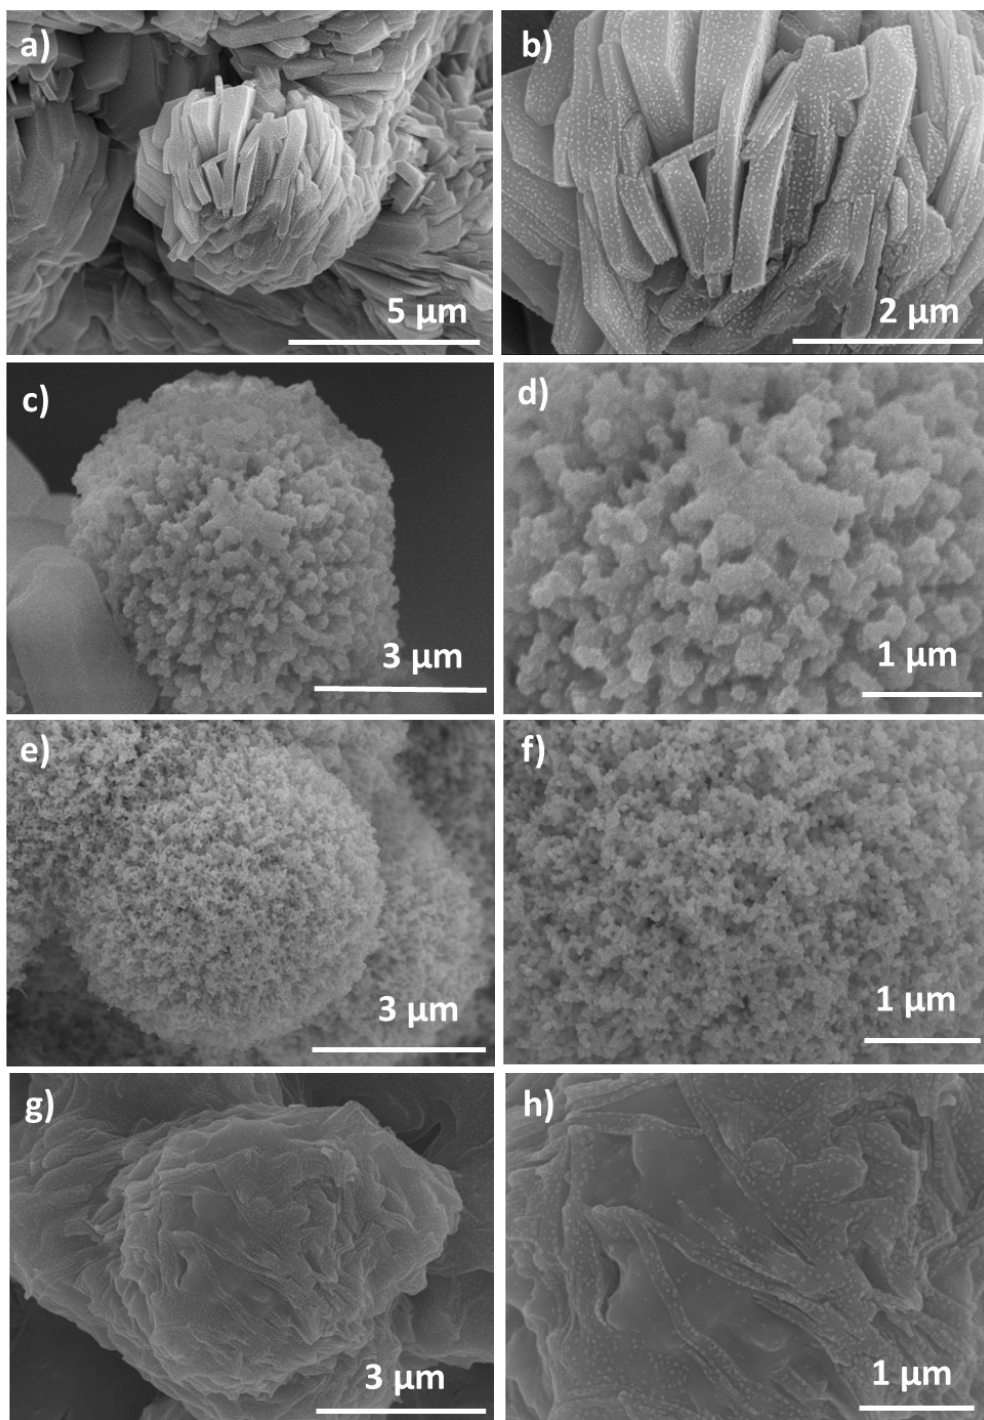

72

73 **Fig. S3.** SEM images of the nanostructure of the (a, b) P-NCB-70-350°, (c, d) P-NCB-210-350°,

74 (e, f) P-NCB-140-300° and (g, h) P-NCB-140-400° samples.

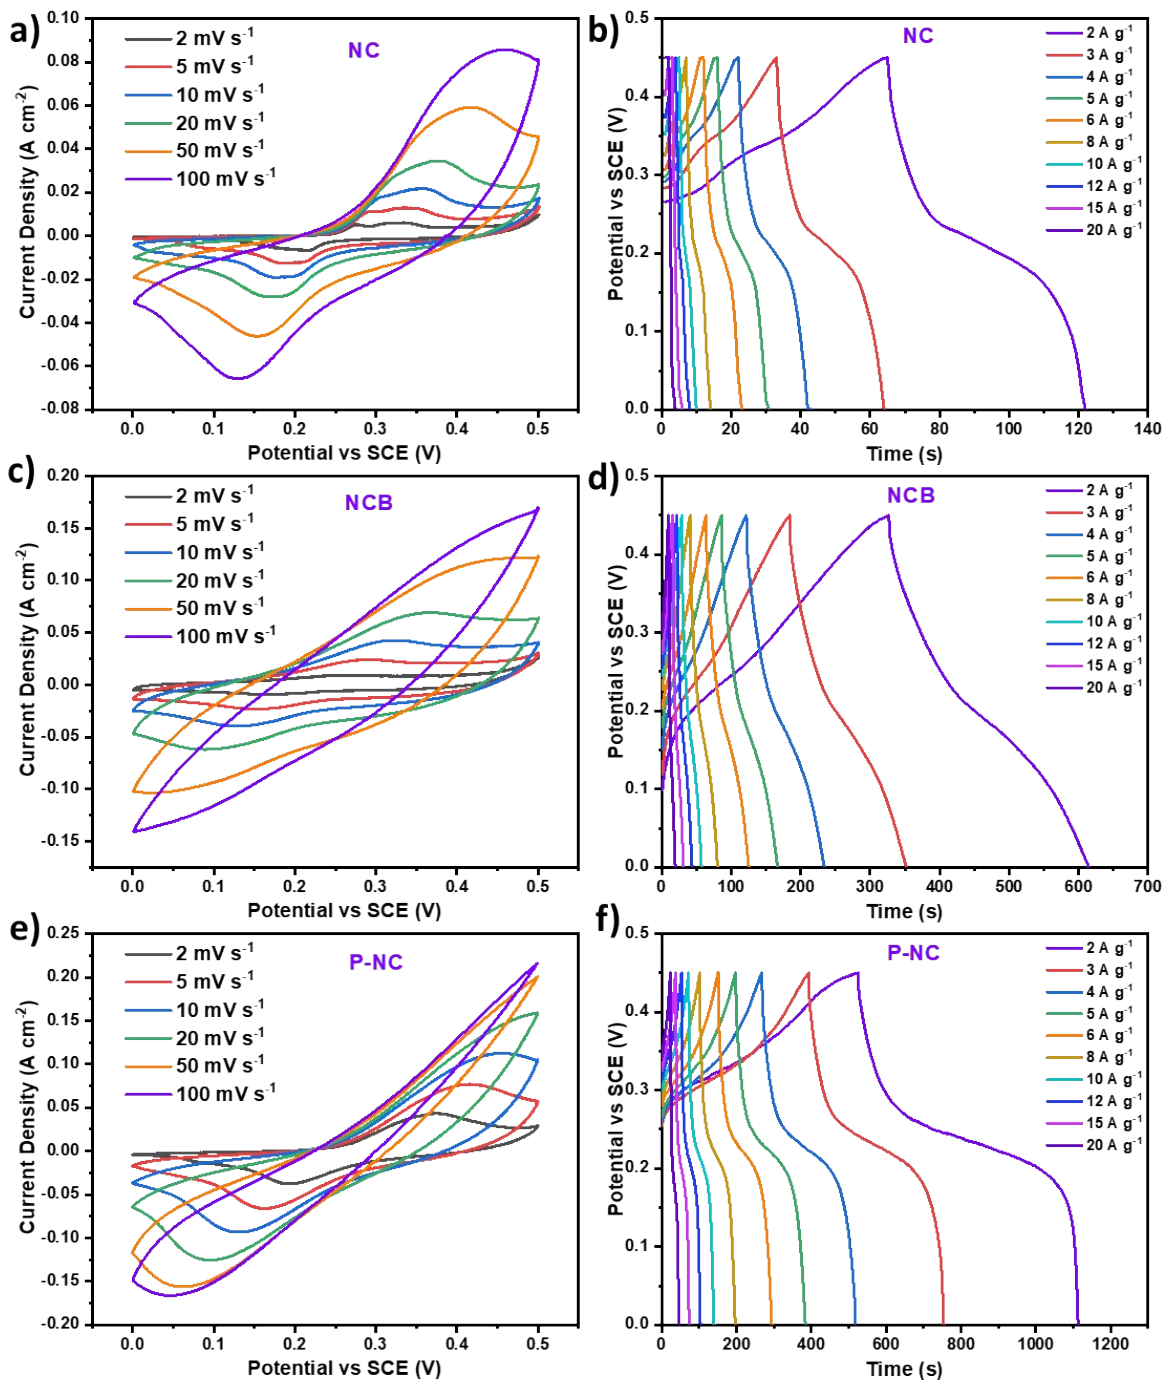

77 **Fig. S4.** CV profile at different scan rate and GCD profile at different current density of (a, b) NC,

78 (c, d) NCB and (e, f) P-NC samples respectively.



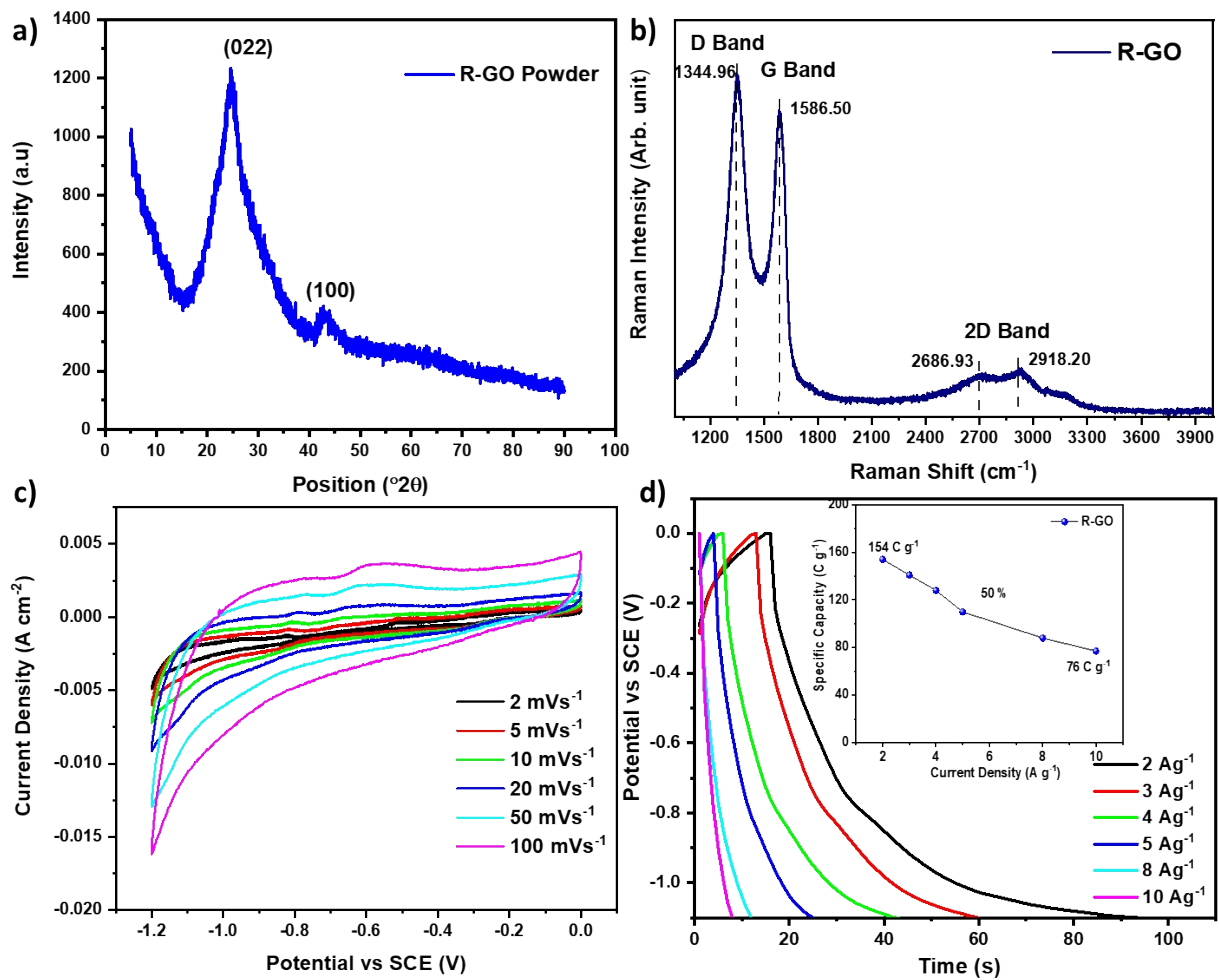

79

80 **Fig. S5.** R-GO characterizations (a) XRD spectra, (b) Raman Spectra, (c) CV profile at different

81 scan rate, (d) GCD profile at different current density.

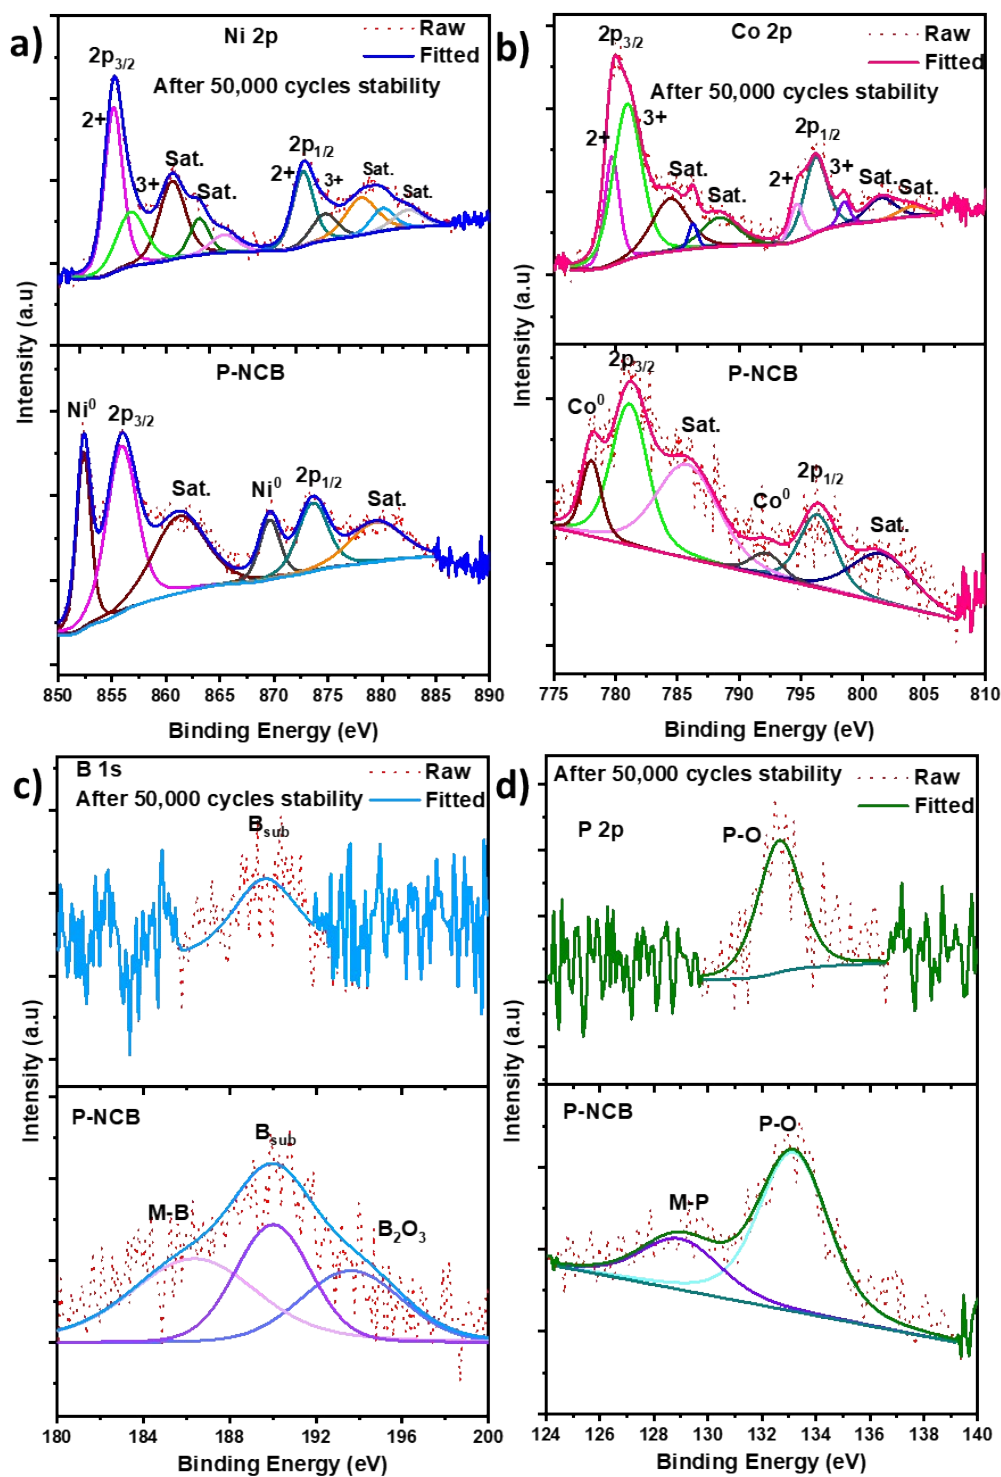

82

83 **Fig. S6.** XPS spectra of post 50,000 cycles of GCD stability of P-NCB sample (a) Ni 2p, (b) Co

84 2p, (c) B 1s and (d) P 2p.

85

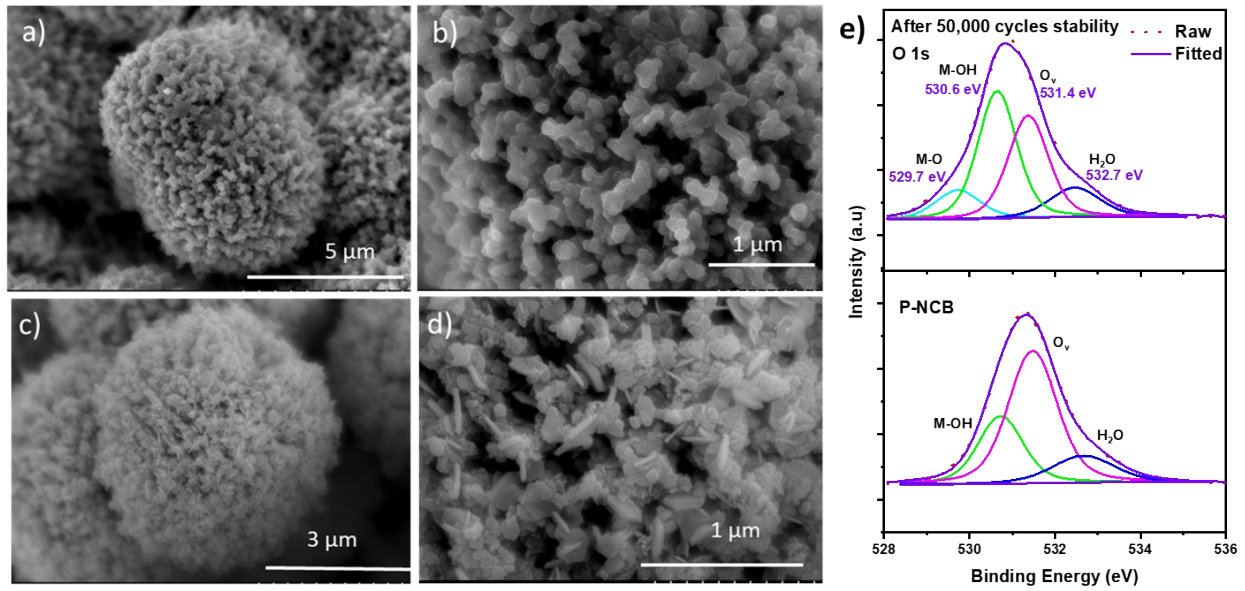

86

87 **Fig. S7.** SEM images of (a, b) P-NCB and (c, d) post 50,000 cycles of GCD stability sample e)

88 XPS spectra of O 1s to indicate the O<sub>v</sub> before and after 50,000 cycles stability.

89

**P-NCB Before stability****P-NCB After stability**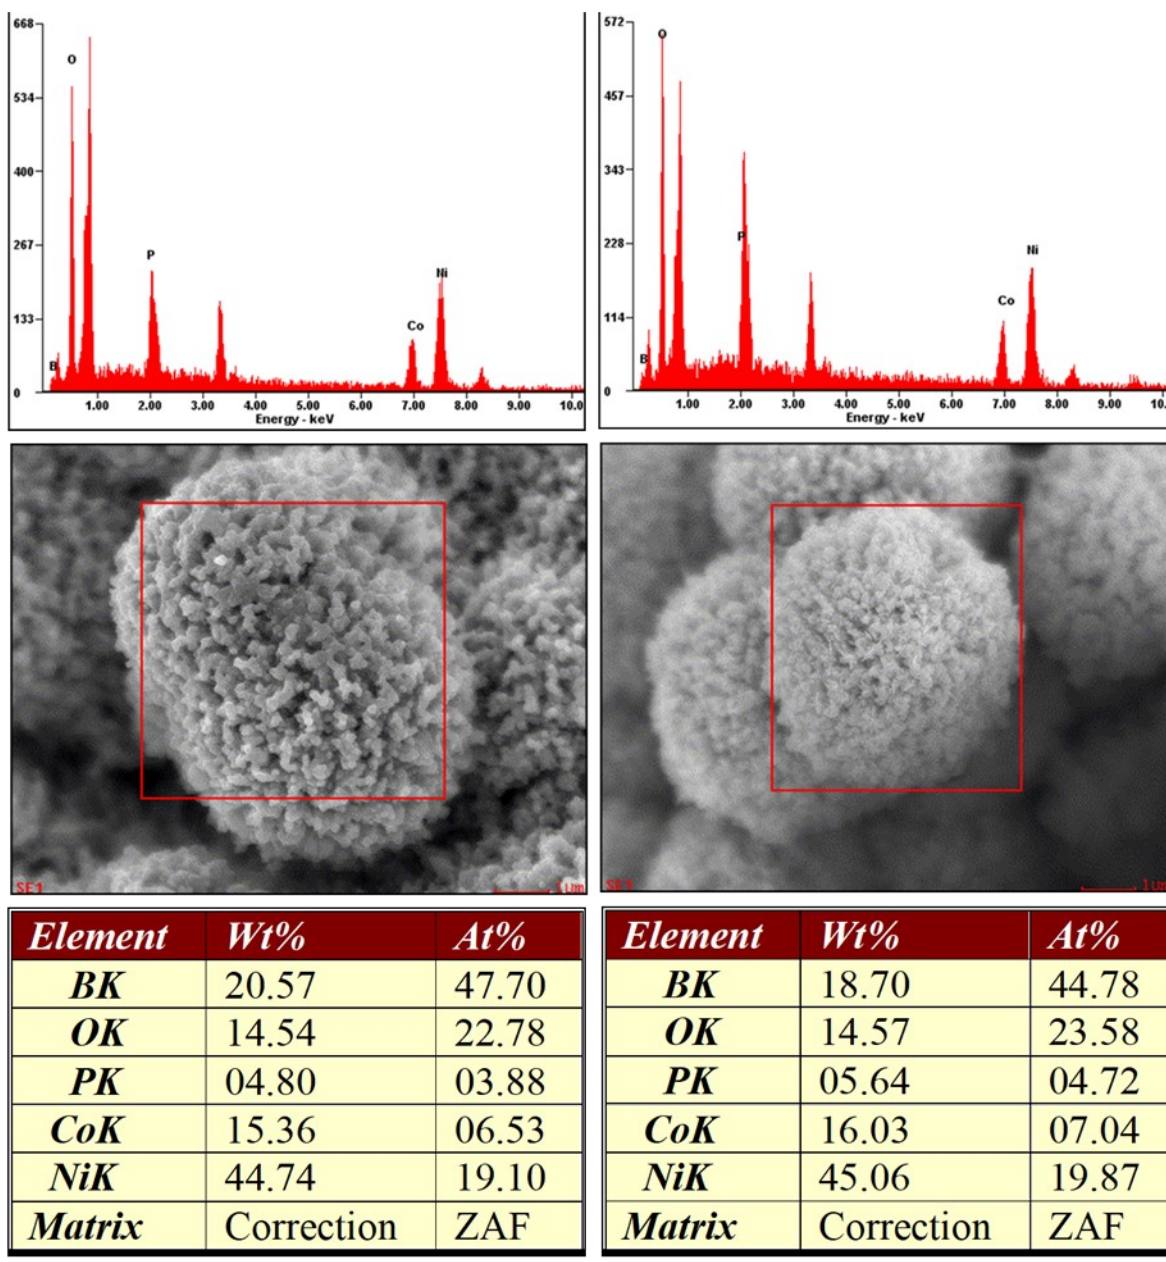

90

91 **Fig. S8.** EDAX analysis on elemental composition of P-NCB (a) before stability and (b) after  
 92 50,000 cycles of GCD stability sample.

93

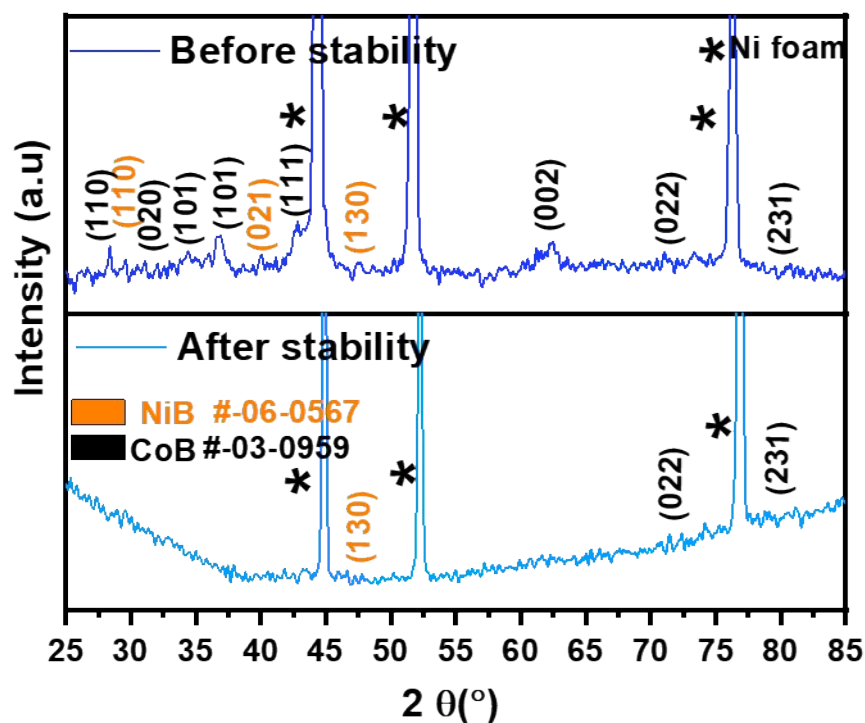

94

95 **Fig. S9.** XRD images of P-NCB pre and post 50,000 cycles of GCD stability sample

96 **Trasatti Method**

97 The contributions of the pseudocapacitive and electrical double layer mechanisms are typically  
 98 calculated using the Trasatti method<sup>3, 4</sup>. First, the areas of the CV curves at various scan rates are  
 99 evaluated and the capacitance is calculated using the following formula:

100 
$$C = \frac{A}{2 \Delta V v}$$

101 where  $C$  is the areal capacitance ( $\text{mF}/\text{cm}^2$ ),  $\Delta V$  refers to the potential window (V), and  $A$  is the area  
 102 enclosed by the CV curves ( $\text{mAV}/\text{cm}^2$ ) at different scan rates  $v$  (V/s). Assuming a semi-infinite  
 103 diffusion pattern of ion diffusion, a linear relationship can be derived between the reciprocal of  
 104 areal capacitance ( $1/C$ ) and square root of scan rates ( $v^{1/2}$ ) as follows:

105 
$$\frac{1}{C} = \frac{1}{C_T} + cv^{1/2}$$

106 where  $C_T$  is the maximum capacitance (mF/cm<sup>2</sup>), the sum of the contributions of the  
107 pseudocapacitive and electrical double layer mechanisms, and  $c$  is a constant. The electrical double  
108 layer contribution can be calculated using the following relation,

109 
$$C = C_{EDLC} + cv^{-1/2}$$

110 The intercept obtained from linear fitting of the above relationship gives the value of the  
111 electrical double layer contribution at the maximum areal capacitance. The subtraction of  $C_{EDLC}$   
112 from  $C_T$  yields the maximum pseudocapacitance ( $C_D$ ).

113 
$$C_D = C_T - C_{EDLC}$$

114 The power-law equation was employed

115 
$$i = av^b$$

116 
$$\log i = \log a + b \log v$$

117 where  $i$  is the redox peak current (mA),  $v$  is the scan rate (mV/s), and  $a$  and  $b$  are constants<sup>5</sup>.

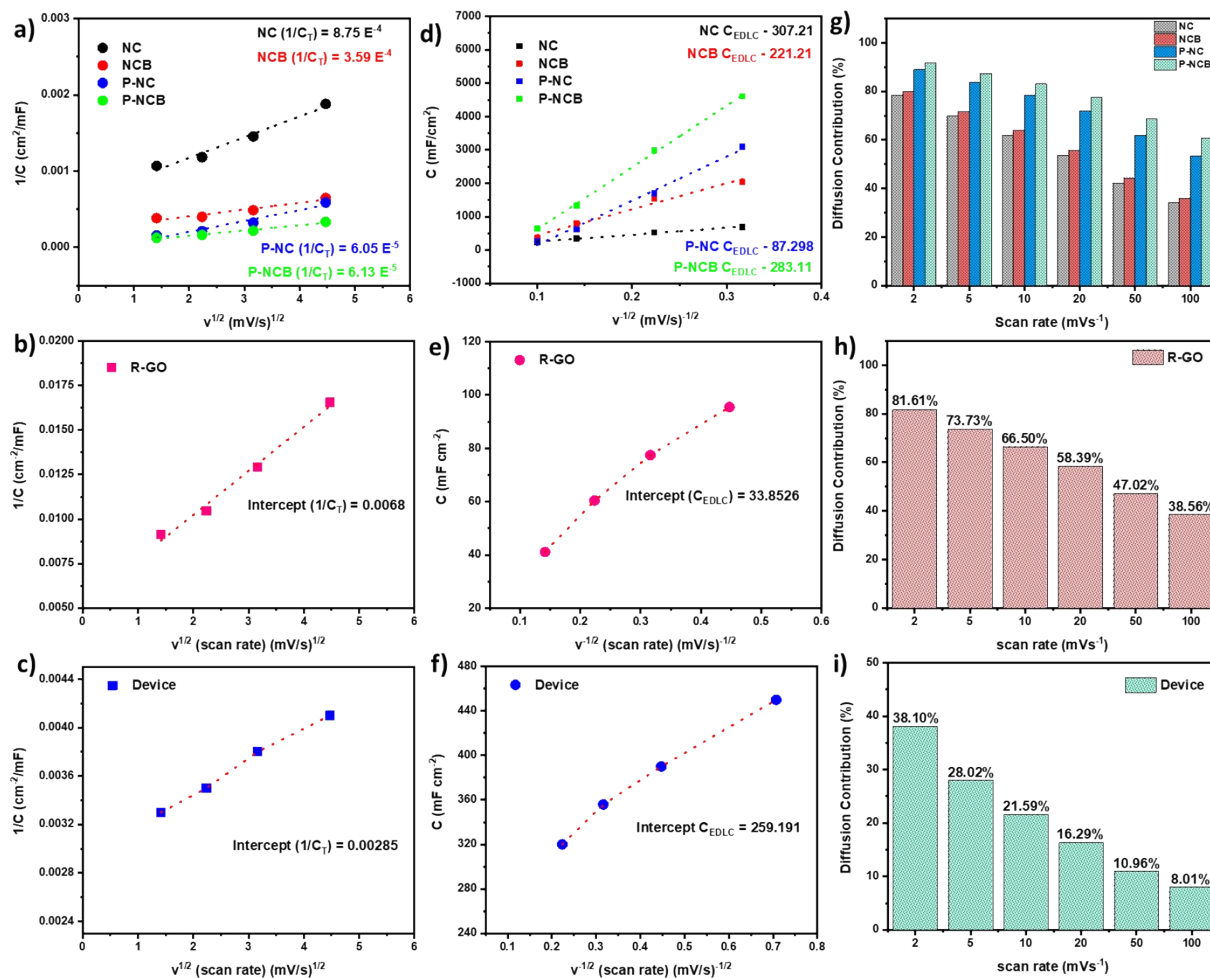

118

119 **Fig. S10.** (a, b, c) Plots of reciprocal of areal capacitance ( $1/C$ ) versus square root of scan rates  
 120 ( $v^{1/2}$ ) and (d, e, f) plots of gravimetric capacitance ( $C$ ) versus reciprocal of square root of scan rate  
 121 ( $v^{-1/2}$ ) and (g, h, i) Calculated contribution of diffusion controlled charge storage mechanism of the  
 122 P-NCB, R-GO and device P-NCB//R-GO respectively.

### 123 Calculation of Surface-Active Sites

124 Associated charge with the reduction peak ( $Q$ ) can be calculated using the following expression<sup>6</sup>:

$$125 \quad Q = \frac{\int I dV}{v}$$

126 where  $Q$  (C) is the total charge associated with the reduction peak and  $v$  (V/s) is the scan rate. For  
127 simplicity, we assume that all the surface redox reactions are single electron transfer reactions.  
128 Then, the number of electrons calculated above is the number of surface-active sites ( $N$ ).  $q = 1.602$   
129  $\times 10^{-19}$  C.

$$130 \quad N = \frac{Q}{q}$$



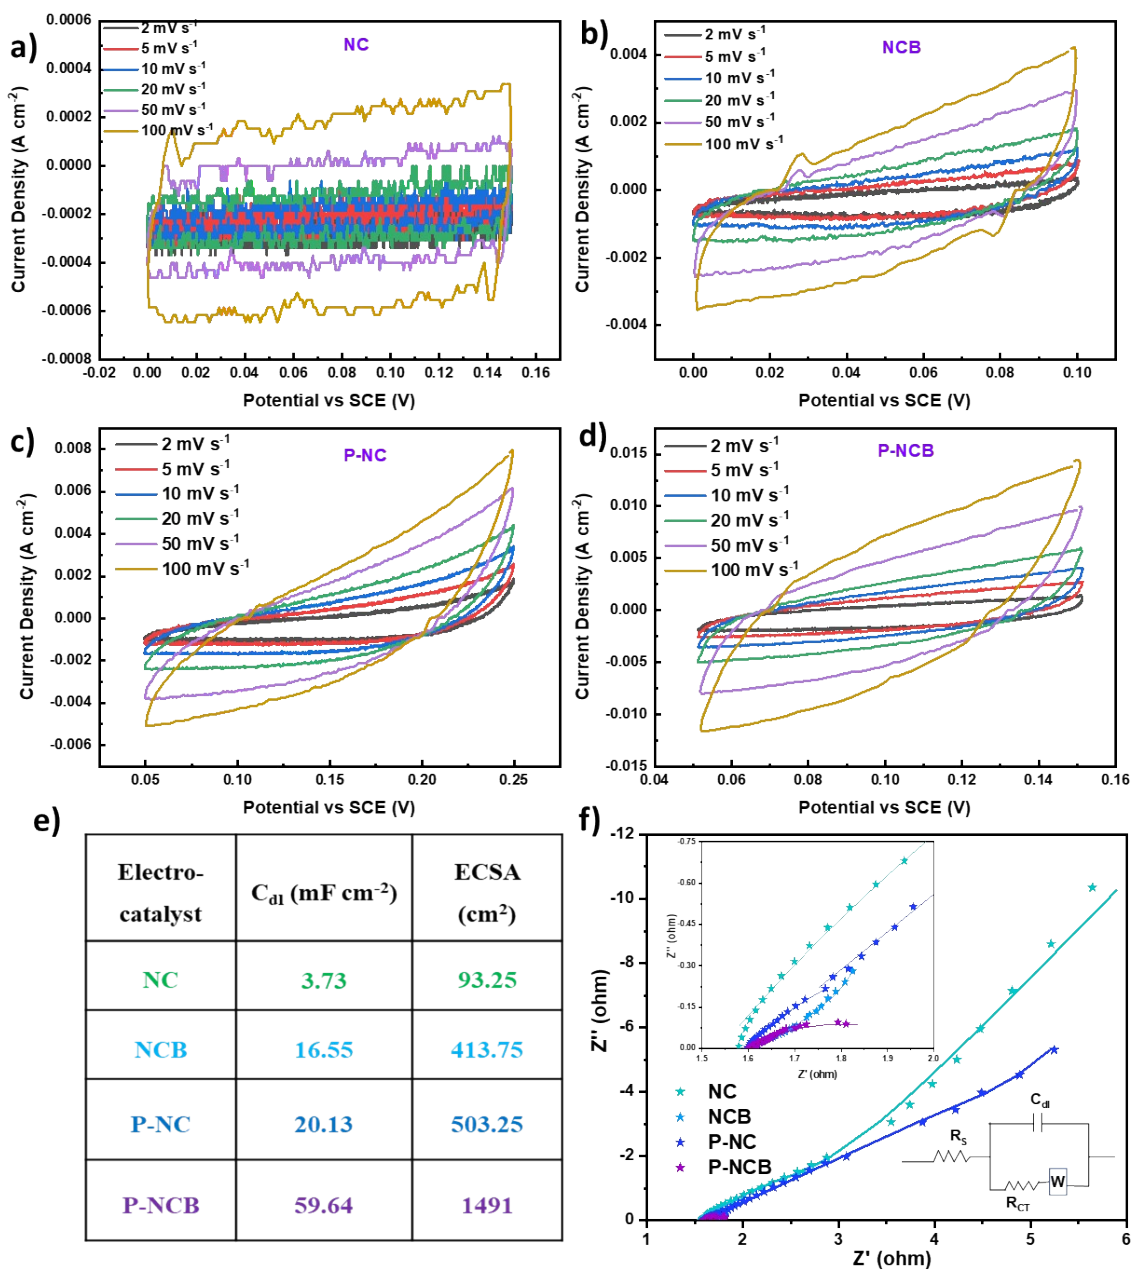

131

132 **Fig. S11.** CV profile of non-faradaic regions of (a) NC, (b) NCB, (c) P-NC, (d) P-NCB  
 133 respectively, (e) ECSA calculation derived from C<sub>dl</sub>, and (f) Nyquist plots for the as-prepared  
 134 samples at 0.4 V<sub>SCE</sub> and the image shows the electrochemical equivalent circuit (inset: magnified  
 135 image of Nyquist plot).

136 **Table S1.** A comparison between the solution resistance ( $R_s$ ) and charge transfer resistance ( $R_{ct}$ ) of  
 137 the samples after fitting the EIS data.

| Sample | $R_s$ ( $\Omega \text{ cm}^{-2}$ ) | $R_{ct}$ ( $\Omega \text{ cm}^{-2}$ ) |
|--------|------------------------------------|---------------------------------------|
| NC     | 1.593                              | 10.51                                 |
| NCB    | 1.606                              | 1.4945                                |
| P-NC   | 1.601                              | 1.608                                 |
| P-NCB  | 1.592                              | 0.409                                 |

138

139 **Table S2.** Comparison of the electrochemical performance in 2 M KOH solution of the P-NCB in  
 140 three electrode setup with reported electrocatalysts.

| S. No. | Material             | Electrolyte | Specific capacitance, F/g, or Capacity, C/g (Current density, A/g) | Stability (Cycles)       | Ref.      |
|--------|----------------------|-------------|--------------------------------------------------------------------|--------------------------|-----------|
| 1      | P-NCB                | 2 M KOH     | 3502 F/g or 1576 C/g (2 A/g)                                       | 85.20% (50,000) @ 40 A/g | This work |
| 2      | Ni-Co-B              | 6 M KOH     | 2226.96 F/g (1 A/g)                                                | 94.9% (1,000) @ 5 A/g    | 7         |
| 3      | NCB@NCB <sub>i</sub> | 2 M KOH     | 2415 F/g (1 A/g)                                                   | 91.2% (5,000) @ 5 A/g    | 8         |
| 4      | Ni <sub>x</sub> B/G  | 6 M KOH     | 1822 F/g (1 mV/s)                                                  | 96% (2,000) @ 3 A/g      | 9         |
| 5      | PMNC/G-x             | 6 M KOH     | 1668 F/g (0.5 A/g)                                                 | 83% (2,000) @ 3 A/g      | 10        |
| 6      | CoB-AC               | 6 M KOH     | 412 F/g (1 A/g)                                                    | 66.7% (10,000) @ 5 A/g   | 11        |

|    |                                                     |         |                      |                         |    |
|----|-----------------------------------------------------|---------|----------------------|-------------------------|----|
| 7  | Ni <sub>3</sub> V <sub>2</sub> O <sub>8</sub> @Co-B | 6 M KOH | 216 mAh/g (500 mA/g) | NA                      | 12 |
| 8  | NiCoP                                               | 1 M KOH | 1691 F/g (1 A/g)     | 80% (10,000) @ 10 A/g   | 13 |
| 9  | NiB                                                 | 2 M KOH | 2230 F/g (1 A/g)     | 97.9 % (2,000) @ 10 A/g | 14 |
| 10 | NCP-4                                               | 1 M KOH | 2228 F/g (1.5 A/g)   | 85 % (5,000) @15 A/g    | 15 |

141

142 **Table S3.** Comparison of the electrochemical performance of device prepared using P-NCB// R-GO  
 143 with reported other device setups.

| S. No. | Supercapacitor/Supercapattery devices                   | Cell voltage (V) | Electrolyte | C <sub>s</sub> (F/g) (Current density, A/g) | Stability (Cycles)       | Energy density (Wh/kg) | Power density (W/kg) | Ref.      |
|--------|---------------------------------------------------------|------------------|-------------|---------------------------------------------|--------------------------|------------------------|----------------------|-----------|
| 1      | P-NCB//R-GO                                             | 1.5              | 2 M KOH     | 202 F/g (303 C/g) (2 A/g)                   | 83.33% (15,000) @ 15 A/g | 63/41                  | 750/15k              | This work |
| 2      | NCB-2//AC                                               | 1.6              | 2 M KOH     | 191.2 F/g (1 A/g)                           | 93.8% (5,000) @ 2 A/g    | 74/24                  | 420/18k              | 8         |
| 3      | Ni <sub>x</sub> B/G//activated carbon                   | 1.6              | 6 M KOH     | 133 F/g (1 A/g)                             | 96% (2,000) @ 5 A/g      | 50/22                  | 200/2.5k             | 9         |
| 4      | PMNC/G-2//AC                                            | 1.4              | 2 M KOH     | 122 F/g (5 A/g)                             | 83% (10,000) @ 5 A/g     | 41/29                  | 216/4.2k             | 10        |
| 5      | CoB-AC//AC                                              | 1.6              | 6 M KOH     | 53.8 F/g (0.25 A/g)                         | 80 % (10,000) @ 2 A/g    | 19/8                   | 200/8k               | 11        |
| 6      | Ni <sub>3</sub> V <sub>2</sub> O <sub>8</sub> @Co-B//AC | 1.6              | 6 M KOH     | 257 F/g (500 mA/g)                          | 47 % (10,000)            | 91/21                  | 400/8k               | 12        |

|   |           |     |         |                   |                        |         |           |    |
|---|-----------|-----|---------|-------------------|------------------------|---------|-----------|----|
|   |           |     |         |                   | @ 5 A/g                |         |           |    |
| 7 | NiCoP//AC | 1.4 | 1 M KOH | 256.2 F/g (2 A/g) | NA                     | 36/29   | 1.8k/8.3k | 13 |
| 8 | NiB//AC   | 1.6 | 2 M KOH | 135.5 F/g (1 A/g) | 88.2 % (5,000) @ 5 A/g | 59/8.7  | 1k/13.5k  | 14 |
| 9 | NCP-4//AC | 1.6 | 1 M KOH | 90 F/g (0.4 A/g)  | 89 % (4,000) @ 5 A/g   | 32/23.1 | 320/1.6k  | 15 |

144

## 145 References

- 146 1. T. Kavinkumar, A. T. Sivagurunathan and D.-H. Kim, *Appl. Surf. Sci.*, 2023, **616**, 156453.
- 147 2. S. Adhikari, S. Selvaraj, S.-H. Ji and D.-H. Kim, *Small*, 2020, **16**, 2005414.
- 148 3. Z. Chen, V. Augustyn, X. Jia, Q. Xiao, B. Dunn and Y. Lu, *ACS Nano*, 2012, **6**, 4319-4327.
- 149 4. S. Ardizzone, G. Fregonara and S. Trasatti, *Electrochim. Acta.*, 1990, **35**, 263-267.
- 150 5. X. Yin, C. Zhi, W. Sun, L.-P. Lv and Y. Wang, *J. Mater. Chem. A*, 2019, **7**, 7800-7814.
- 151 6. S. Seenivasan, H. Jung, J. W. Han and D.-H. Kim, *Small Methods*, 2022, **6**, 2101308.
- 152 7. R. Chen, L. Liu, J. Zhou, L. Hou and F. Gao, *J. Power Sources.*, 2017, **341**, 75-82.
- 153 8. Q. Zhang, J. Zhao, Y. Wu, J. Li, H. Jin, S. Zhao, L. Chai, Y. Wang, Y. Lei and S. Wang,  
154 *Small*, 2020, **16**, 2003342.
- 155 9. Y. Chen, T. Zhou, L. Li, W. K. Pang, X. He, Y.-N. Liu and Z. Guo, *ACS Nano*, 2019, **13**,  
156 9376-9385.
- 157 10. Y. Chen, W. K. Pang, H. Bai, T. Zhou, Y. Liu, S. Li and Z. Guo, *Nano Lett.*, 2017, **17**, 429-  
158 436.
- 159 11. J.-F. Hou, J.-F. Gao and L.-B. Kong, *New J. Chem.*, 2019, **43**, 14475-14484.
- 160 12. J.-F. Hou, J.-F. Gao and L.-B. Kong, *Electrochim. Acta.*, 2021, **377**, 138086.

- 161 13. M. Gao, W.-K. Wang, X. Zhang, J. Jiang and H.-Q. Yu, *J. Phys. Chem. C.*, 2018, **122**,  
162 25174-25182.
- 163 14. W. Li, S. Wang, M. Wu, X. Wang, Y. Long and X. Lou, *New J. Chem.*, 2017, **41**, 7302-  
164 7311.
- 165 15. S. J. Marje, S. S. Pujari, S. A. Khalate, V. V. Patil, V. G. Parale, T. Kim, H.-H. Park, J. L.  
166 Gunjekar, C. D. Lokhande and U. M. Patil, *J. Mater. Chem. A.*, 2022, **10**, 11225-11237.
- 167
